# Supplementary material for: Experimental determination of the global warming potential of carbonyl fluoride
Source: Copernicus journal article supplement (doi:10.5194/egusphere-2025-4415), 2025-10-01
Supplement: Supplementary file 1 [file egusphere-2025-4415-supplement.pdf]

# Supporting Information

## Experimental Determination of the Global Warming Potential of Carbonyl Fluoride (COF<sub>2</sub>)

Dongkyum Kim<sup>1</sup>, Jeongsoon Lee<sup>1,2,\*</sup>

<sup>1</sup> Semiconductor and Display Metrology Group, Korea Research Institute of Standards and Science (KRISS), 267 Gajeong-ro, Yuseong-gu, Daejeon 34113, Republic of Korea

<sup>2</sup> Science of Measurement, University of Science and Technology (UST), 217 Gajeong-ro, Yuseong-gu, Daejeon 34113, Republic of Korea

\* Corresponding Author: [leejs@kriss.re.kr](mailto:leejs@kriss.re.kr)

This Supporting Information provides important data and detailed descriptions of certain experimental methods not included in the main text, which are crucial for the discussion in the study titled 'Experimental Determination of the Global Warming Potential of Carbonyl Fluoride (COF<sub>2</sub>) via FTIR Spectroscopy and Atmospheric Lifetime Measurements'. It includes an investigation into the linear absorbance range of COF<sub>2</sub> in infrared spectroscopy (**Fig. S1**), as well as detailed information about the DFT methods applied to COF<sub>2</sub> and COH<sub>2</sub>, along with the results of these calculations.

Furthermore, this section presents a comprehensive computational analysis of the molecular geometries and spectroscopic properties of COF<sub>2</sub> and COH<sub>2</sub>, derived from Density Functional Theory (DFT) calculations. The optimized structures, bond lengths, and bond angles of COF<sub>2</sub> and COH<sub>2</sub> are provided, with particular attention to the molecular geometry of COH<sub>2</sub> (**Fig. S2**), including precise descriptions of bond lengths and angles. These data and methods complement the experimental results and provide further insights into the climate impact of carbonyl fluoride.

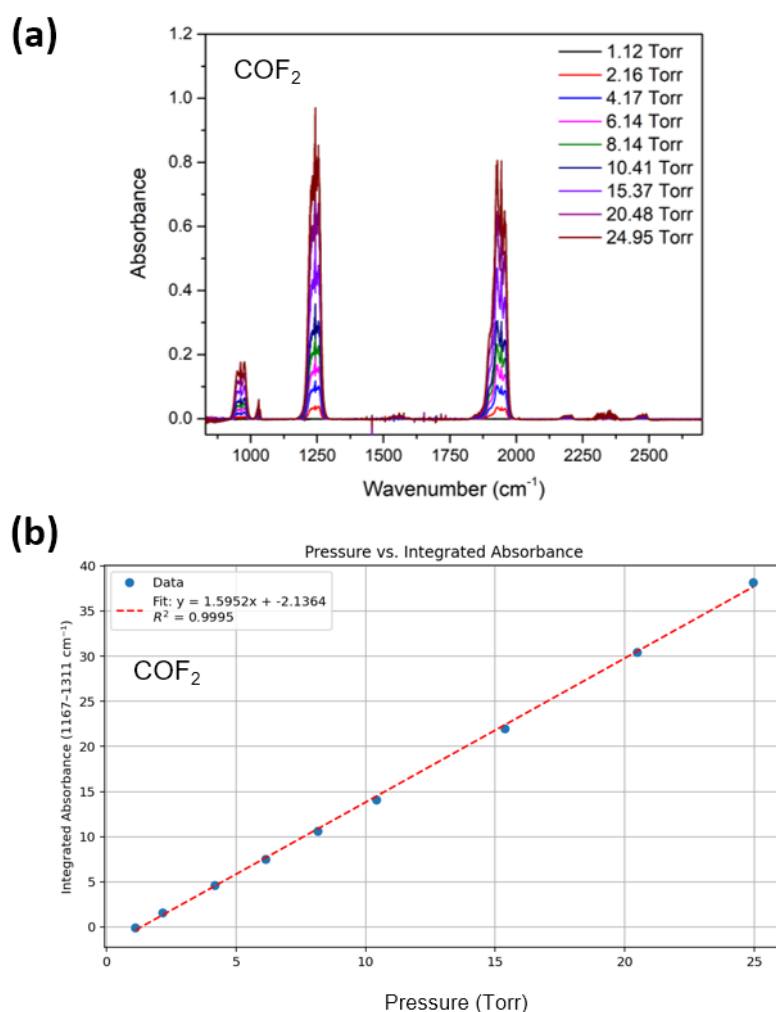

**Figure S1.** Linearity of COF<sub>2</sub> absorbance with pressure. (a) FTIR spectra of COF<sub>2</sub> at various pressures (from 1.12 to 24.95 Torr) showing the absorbance peaks across different wavenumbers. (b) Integrated absorbance values (1617-1311 cm<sup>-1</sup>) plotted against pressure, demonstrating a strong linear relationship with a correlation coefficient ( $R^2$ ) of 0.9995. The red dashed line represents the linear fit with the equation:  $y = 1.5952x + 2.1364$ .

## ● Computational Properties of COF<sub>2</sub>: Geometry and Spectroscopic Analysis

### 1. Computational Methods for COF<sub>2</sub>

The geometry optimization and vibrational frequency calculation for COF<sub>2</sub> were performed using the following computational methods:

- Method: B3LYP (Hybrid Density Functional Theory)
- Basis Set: 6-31++G(d,p) (Double-zeta with polarization functions on heavy atoms)
- Job Types:
  - Geometry optimization (opt)

- Frequency calculation (freq)
- Additional Options:
  - raman: Raman scattering activities calculation
  - nosymm: No symmetry applied
  - geom=connectivity: Atomic connectivity specified

These calculations were performed to determine the optimized molecular geometry and vibrational frequencies of COF<sub>2</sub>.

## 2. Molecular Geometry of COF<sub>2</sub>

Molecular Geometry (Z-Matrix Representation)

The optimized molecular geometry of COF<sub>2</sub> in Z-matrix format is provided below:

|   |           |           |          |
|---|-----------|-----------|----------|
| C | 0.000000  | 0.145750  | 0.000000 |
| F | -1.071041 | -0.637527 | 0.000000 |
| F | 1.071122  | -0.637374 | 0.000000 |
| O | -0.000091 | 1.324951  | 0.000000 |

This structure represents the COF<sub>2</sub> molecule in its optimized geometry with the following key parameters:

- Carbon (C) at the origin, with two fluorine (F) atoms symmetrically positioned around it.
- The oxygen (O) atom is positioned along the y-axis.

## 3. Vibrational Frequencies and Infrared Intensities of COF<sub>2</sub>

Vibrational Frequencies and IR Intensities

The following harmonic vibrational frequencies (in cm<sup>-1</sup>) and their corresponding IR intensities are computed:

- 564.3403 cm<sup>-1</sup>: IR intensity = 5.6377
- 604.2895 cm<sup>-1</sup>: IR intensity = 7.1162
- 759.2987 cm<sup>-1</sup>: IR intensity = 38.9245
- 957.8721 cm<sup>-1</sup>: IR intensity = 61.8239
- 1224.8148 cm<sup>-1</sup>: IR intensity = 458.8512
- 1973.4157 cm<sup>-1</sup>: IR intensity = 487.6805

These frequencies correspond to various vibrational modes in the COF<sub>2</sub> molecule, with significant IR absorption intensities observed at higher frequencies, notably the C=O stretching mode around 1973.4157 cm<sup>-1</sup>.

## 4. Raman Scattering Activities for COF<sub>2</sub>

Raman Scattering Activities

The Raman activities (in arbitrary units) for the key vibrational modes are as follows:

- 564.3403 cm<sup>-1</sup>: Raman activity = 1.2889
- 604.2895 cm<sup>-1</sup>: Raman activity = 2.5761

- 759.2987  $\text{cm}^{-1}$ : Raman activity = 0.7335
- 957.8721  $\text{cm}^{-1}$ : Raman activity = 7.9966
- 1224.8148  $\text{cm}^{-1}$ : Raman activity = 1.1309
- 1973.4157  $\text{cm}^{-1}$ : Raman activity = 10.5506

These values provide insights into the molecular vibrations that are active in Raman spectroscopy.

## ● Computational Properties of COH<sub>2</sub>: Geometry and Spectroscopic Analysis

### 1. Computational Methods for COH<sub>2</sub>

The geometry optimization and vibrational frequency calculation for COH<sub>2</sub> were performed using the following computational methods:

- Method: B3LYP (Hybrid Density Functional Theory)
- Basis Set: 6-31++G(d,p) (Double-zeta with polarization functions on heavy atoms)
- Job Types:
  - Geometry optimization (opt)
  - Frequency calculation (freq)
- Additional Options:
  - raman: Raman scattering activities calculation
  - nosymm: No symmetry applied
  - geom=connectivity: Atomic connectivity specified

These calculations were performed to determine the optimized molecular geometry and vibrational frequencies of COH<sub>2</sub>.

### 2. Molecular Geometry of COH<sub>2</sub>

Molecular Geometry (Z-Matrix Representation)

The optimized molecular geometry of COH<sub>2</sub> in Z-matrix format is provided below:

|   |           |           |          |
|---|-----------|-----------|----------|
| C | 0.000000  | 0.115053  | 0.000000 |
| O | -0.000051 | 1.324660  | 0.000000 |
| H | -0.941441 | -0.470368 | 0.000000 |
| H | 0.941485  | -0.470291 | 0.000000 |

This structure represents the COH<sub>2</sub> molecule with the following key parameters:

- Carbon (C) at the origin, with two hydrogen (H) atoms and one oxygen (O) atom.

### 3. Vibrational Frequencies and Infrared Intensities of COH<sub>2</sub>

### Vibrational Frequencies and IR Intensities

The following harmonic vibrational frequencies (in  $\text{cm}^{-1}$ ) and their corresponding IR intensities are computed:

- 121.8725  $\text{cm}^{-1}$ : IR intensity = 0.0
- 116.255  $\text{cm}^{-1}$ : IR intensity = 0.0
- 121.8725  $\text{cm}^{-1}$ : IR intensity = 0.0
- 180.0  $\text{cm}^{-1}$ : IR intensity = 0.0

These frequencies correspond to various vibrational modes in the  $\text{COH}_2$  molecule, with significant IR absorption intensities observed at higher frequencies.

### 4. Raman Scattering Activities for $\text{COH}_2$

#### Raman Scattering Activities

The Raman activities (in arbitrary units) for the key vibrational modes are as follows:

- 121.8725  $\text{cm}^{-1}$ : Raman activity = 0.0
- 116.255  $\text{cm}^{-1}$ : Raman activity = 0.0
- 121.8725  $\text{cm}^{-1}$ : Raman activity = 0.0
- 180.0  $\text{cm}^{-1}$ : Raman activity = 0.0

These values reflect the molecular vibrations that are active in Raman spectroscopy.

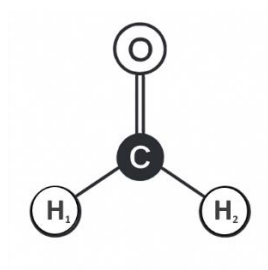

Formaldehyde  
( $\text{COH}_2$ , MW = 30.03 g/mol)

| Bond lengths                | Bond angles                                  |
|-----------------------------|----------------------------------------------|
| C=O: 1.2096 Å               | $\angle \text{H}_1\text{--C--O}$ : 121.87°   |
| C-H <sub>1</sub> : 1.1086 Å | $\angle \text{H}_2\text{--C--O}$ : 121.87°   |
| C-H <sub>2</sub> : 1.1086 Å | $\angle \text{H}_1\text{--C--H}_2$ : 116.26° |

**Figure S2.** Optimized structure of carbonyl fluoride ( $\text{COH}_2$ ) obtained from DFT calculations. The molecular weight of  $\text{COH}_2$  is 30.03 g/mol. The bond lengths are C=O: 1.2096 Å, and C-H<sub>1</sub> / C-H<sub>2</sub>: 1.1086 Å. The bond angles are  $\angle \text{H}_1 \text{ or } 2\text{--C--O} = 121.87^\circ$  and  $\angle \text{H}_1\text{--C--H}_2 = 116.26^\circ$ .

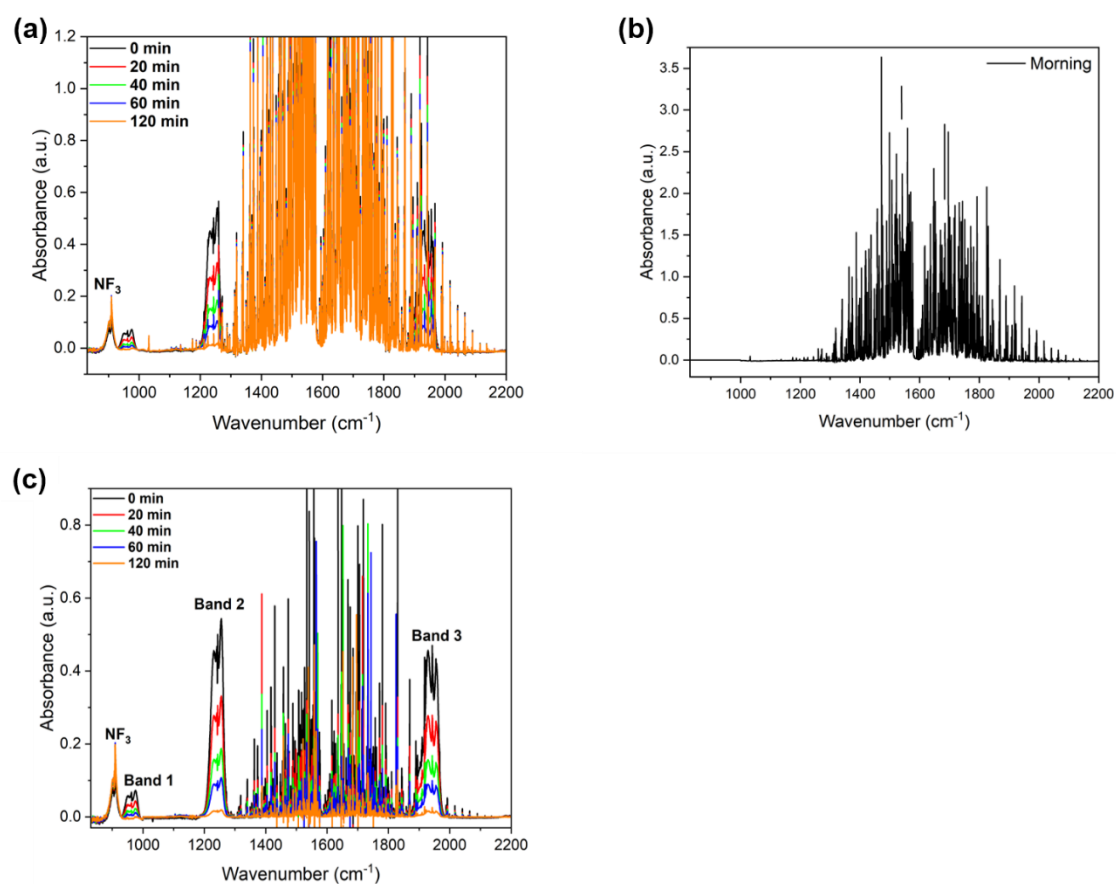

**Figure S3.** FTIR absorbance spectra obtained during the atmospheric chemical reactions under humid morning conditions. (a) Original spectra collected at different reaction times (0–120 min), showing the time evolution of absorption features. (b) Spectrum obtained after the end of reactions (180 min), which is consisted of atmospheric water vapor in the morning, shows of high humidity. (c) Spectra obtained after subtracting (b) from (a), clearly show  $\text{NF}_3$  absorption and three characteristic  $\text{COF}_2$  bands (Band 1–3) during the reaction.

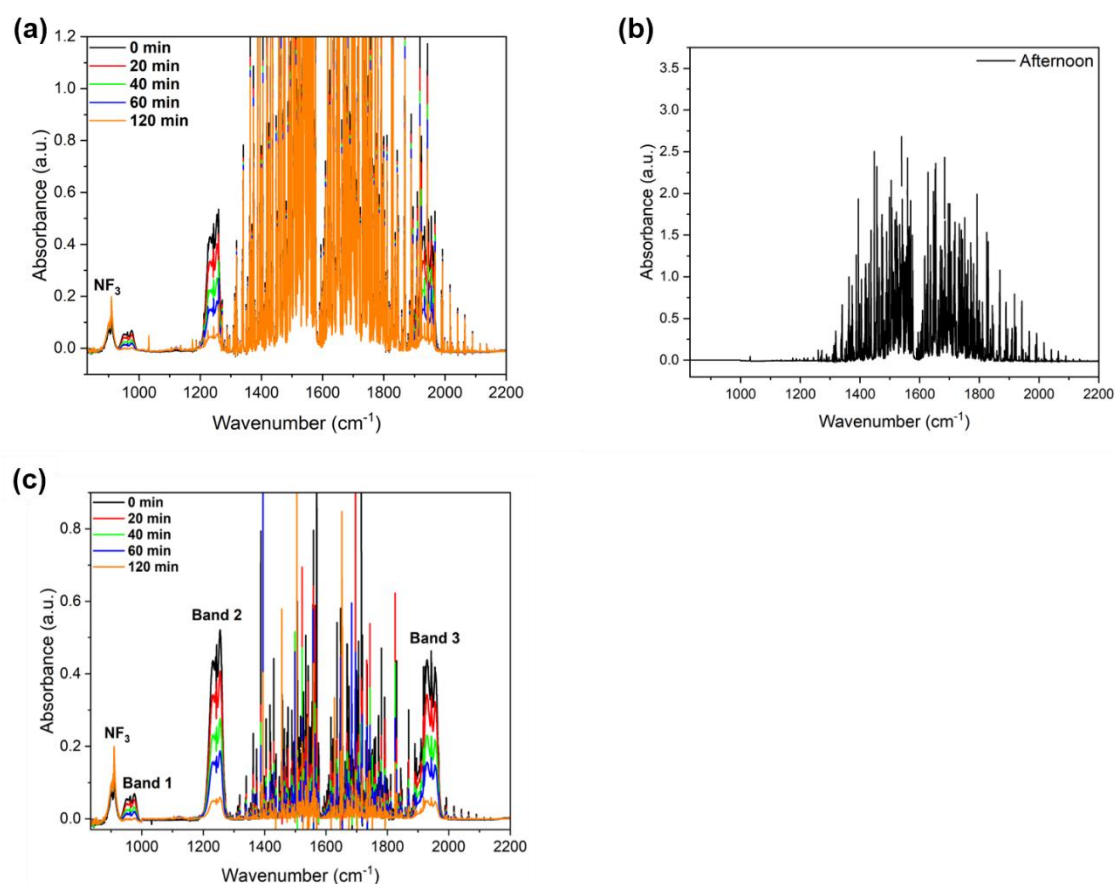

**Figure S4.** FTIR absorbance spectra obtained during the atmospheric chemical reactions at afternoon. (a) Original spectra collected at different reaction times (0–120 min), showing the time evolution of absorption features. (b) Spectrum obtained after the end of reactions (274 min), which is consisted of atmospheric water vapor of low humidity in the afternoon. (c) Spectra obtained by subtracting (b) from (a), clearly distinguishing the three absorption peaks of  $\text{COF}_2$  (bands 1–3) and additionally  $\text{NF}_3$  absorption during reaction.
